# Supplementary material for: Percolation-based precursors of transitions in extended systems
Source: PubMed Central journal article supplement (PMC4944164; doi:10.1038/srep29552), 2016-07-14
Supplement: srep29552-s1.pdf [file srep29552-s1.pdf]

Supplementary Information for  
Percolation-based precursors of transitions in extended  
systems

Víctor Rodríguez-Méndez<sup>1</sup>, Víctor M. Eguíluz<sup>1</sup>, Emilio Hernández-García<sup>1</sup>, and José J. Ramasco<sup>1</sup>

<sup>1</sup>Instituto de Física Interdisciplinar y Sistemas Complejos IFISC (CSIC-UIB), 07122 Palma de Mallorca, Spain

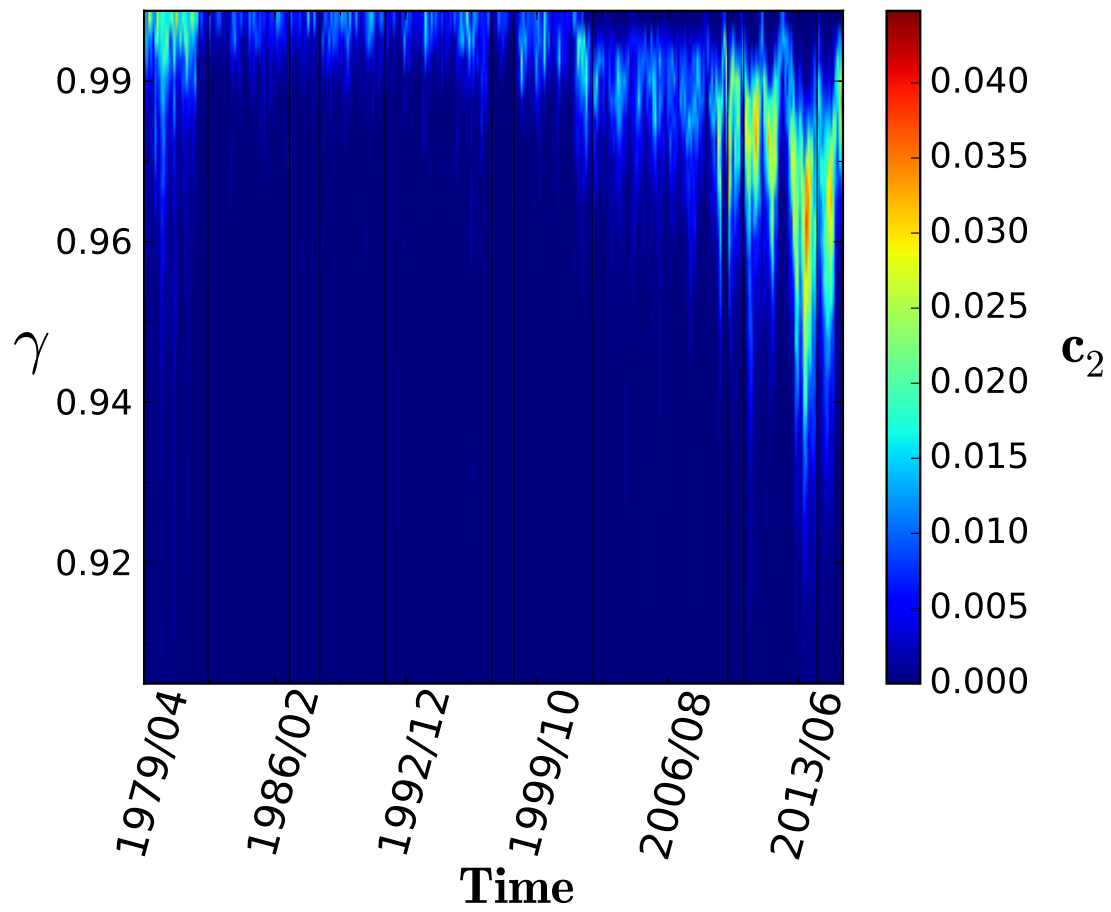

**Figure S1:** Heatmap with an exploration of the fraction of nodes in clusters of size 2,  $c_2$ , as a function of time and of  $\gamma$  for functional networks extracted daily over 30 years of data on the mean Sea Surface Temperature  $T$  monitored in the NINO3.4. The spatial resolution is 0.5 arc degrees.
